# Supplementary material for: The Prognostic Significance of IRF8 Transcripts in Adult Patients with Acute Myeloid Leukemia
Source: PLOS journal article supplement (doi:10.1371/journal.pone.0070812), 2013-08-14
Supplement: S5 (10.1371/journal.pone.0070812.s005) [file journal.pone.0070812.s005]

**Supporting Information Table S5. Association of treatment outcomes with dominant *IRF8* splice variant, based on 165 adult patients with previously untreated AML.**

| Dominant Variant | Pts | Complete Response |     |                | Resistant Disease |     |                |
|------------------|-----|-------------------|-----|----------------|-------------------|-----|----------------|
|                  |     | CR                | %   | P <sub>1</sub> | RD                | %   | P <sub>1</sub> |
| SV1              | 125 | 61                | 49% | 0.38           | 43                | 34% | 0.25           |
| SV2              | 28  | 16                | 57% | [0.21]         | 9                 | 32% | [0.092]        |
| SV3              | 12  | 4                 | 33% |                | 7                 | 58% |                |

| Dominant Variant | Pts | Overall Survival |      |                | Relapse-Free Survival |      |                |
|------------------|-----|------------------|------|----------------|-----------------------|------|----------------|
|                  |     | Deaths           | HR   | P <sub>1</sub> | Events                | HR   | P <sub>1</sub> |
| SV1              | 125 | 110              | 1.00 | 0.077          | 50                    | 1.00 | 0.32           |
| SV2              | 28  | 20               | 0.60 | [0.047]        | 11                    | 0.62 | [0.51]         |
| SV3              | 12  | 10               | 1.01 |                | 3                     | 0.78 |                |

P<sub>1</sub> = p-value based on univariate logistic (CR, RD) or proportional hazards (OS, RFS) regression model (p-value based on multivariate model is shown in brackets).

Analysis of RFS is limited to patients who achieved CR, events include relapse of AML or death from any cause.
