# Supplementary material for: The Prognostic Significance of IRF8 Transcripts in Adult Patients with Acute Myeloid Leukemia
Source: PLOS journal article supplement (doi:10.1371/journal.pone.0070812), 2013-08-14
Supplement: S6 (10.1371/journal.pone.0070812.s006) [file journal.pone.0070812.s006]

**Supporting Information Table S6. Summary of multivariate analyses testing whether prognostic effects of WT- or SV-*IRF8* differ between SV1- and SV2-*IRF8* transcripts.**

| Treatment Outcome     | Interaction of Dominant Peak<br>with WT- <i>IRF8</i> |                    | Interaction of Dominant Peak<br>with SV- <i>IRF8</i> |                    |
|-----------------------|------------------------------------------------------|--------------------|------------------------------------------------------|--------------------|
|                       | Trend                                                | >2-fold vs ≤2-fold | Trend                                                | >2-fold vs ≤2-fold |
| Complete Response     | 0.80                                                 | 0.62               | 0.90                                                 | 0.47               |
| Resistant Disease     | 0.68                                                 | 0.43               | 0.42                                                 | 0.53               |
| Overall Survival      | 0.66                                                 | 0.44               | 0.21                                                 | 0.13               |
| Relapse-Free Survival | 0.043                                                | 0.036              | 0.088                                                | 0.26               |

This table shows likelihood ratio test p-values for testing whether the effect of WT-*IRF8* or SV-*IRF8* expression on treatment outcomes differs between patients with SV1 versus SV2, based on multivariate logistic regression (CR, RD) or proportional hazards regression (OS, RFS) models.
